# Supplementary material
Source: Royal Society of Chemistry journal article supplement (doi:10.1039/d5ea00175g)
Supplement: d5ea00175g1.pdf [file d5ea00175g1.pdf]

## Effects of an electrostatic precipitator on particle mass, composition, and number size distributions in residential wood combustion emissions

Narayan Babu Dhital<sup>a,b,\*</sup>, Juho Louhisalmi<sup>a</sup>, Henna Rinta-Kiikka<sup>a</sup>, Sampsa Väättäin<sup>a</sup>, Jani Leskinen<sup>a</sup>, Olli Sippula<sup>a,c</sup>, Jarkko Tissari<sup>a</sup>

<sup>a</sup>Department of Environmental and Biological Sciences, University of Eastern Finland, 70210 Kuopio, Finland

<sup>b</sup>Department Environmental Science, Patan Multiple Campus, Tribhuvan University, 44700 Lalitpur, Nepal

<sup>c</sup>Department of Chemistry and Sustainable Technology, University of Eastern Finland, 80101 Joensuu, Finland

Corresponding author: [narayan.dhital@uef.fi](mailto:narayan.dhital@uef.fi); [nbdhital@gmail.com](mailto:nbdhital@gmail.com)

### Supplementary Material

#### Content

##### SM-1 Calculation of emission factors

##### SM-2 Supplementary figures

- Fig. S1** Photographs of the traditional wood sauna stove (SS) and modern wood stove (MS) tested in the present study.
- Fig. S2** Relationships between concentrations of gravimetric PM<sub>1</sub>, BC and EC: **(a)** gravimetric PM<sub>1</sub> vs. BC, **(b)** gravimetric PM<sub>1</sub> vs. EC, and **(c)** BC vs. EC. All concentrations are standardized to NTP and 13% O<sub>2</sub>.
- Fig. S3** Comparisons of gravimetric PM<sub>1</sub> between the control and treatment groups under various experimental conditions. Values in blue indicate reduction efficiencies of ESP. Error bars represent SDs.
- Fig. S4** Comparisons of real-time PM and BC concentrations between the control (C) and treatment (T) groups during SS tests: **(a)** PM<sub>1,ELPI</sub> for SS\_BL vs. SS\_ESP, **(b)** PM<sub>1,ELPI</sub> for SS\_SA vs. SS\_SA+ESP, **(c)** BC for SS\_BL vs. SS\_ESP, and **(d)** BC for SS\_SA vs. SS\_SA+ESP. Each curve represents the mean of three replicates and includes two sequential batches: batch 1 (0–35 min) and batch 2 (35 min to the end). All concentrations are standardized to NTP and 13% O<sub>2</sub>. Error bands represent SD.
- Fig. S5** Relationship between OC:EC ratio and AAE in the control (C) and treatment (T) groups; gray arrow shows the direction of change in particle properties from the control to treatment group.
- Fig. S6** Comparison of real-time PNC and AAE between the control (C) and treatment (T) groups during SS tests: **(a)** SS\_BL vs. SS\_ESP and **(b)** SS\_SA vs. SS\_SA+ESP. Each curve represents the mean of three replicates and includes two sequential batches: batch 1 (0–35 min) and batch 2 (35 min to the end). Numerous PNC peaks higher than the control levels can be observed in the treatment test curves, which are indicated by arrows. All concentrations are standardized to NTP and 13% O<sub>2</sub>.
- Fig. S7** Real-time PNC and AAE for the control (C) and treatment (T) batches of MS tests: **(a)** replicate test 1, **(b)** replicate test 2, and **(c)** replicate test 3. All concentrations are standardized to NTP and 13% O<sub>2</sub>. Control and treatment batches are denoted by “OFF” and “ON”, respectively, and are separated by vertical dotted lines. PNC peaks in the treatment batches are indicated by arrows.
- Fig. S8** Comparison of flue gas properties upstream of the ESP between the cases with positive efficiency on PNC (+ve  $\eta_{\text{PNC}}$ ) and negative efficiency on PNC (-ve  $\eta_{\text{PNC}}$ ): **(a)** organic gaseous carbon (OGC) concentration, **(b)** OC:EC ratio and **(c)** AAE.
- Fig. S9** Relationship between OC:EC ratio and GMD: **(a)** control batches and **(b)** treatment batches. Scatter points in blue represent the experimental conditions exhibiting positive ESP efficiency on PNC (+ve  $\eta_{\text{PNC}}$ ), whereas scatter points in pink represent those exhibiting negative ESP efficiency on PNC (-ve  $\eta_{\text{PNC}}$ ). One of the batches in the treatment group had a very high OC:EC (> 8), which could be due to high measurement uncertainty at low particulate matter emissions.
- Fig. S10** Comparison of emission reduction efficiencies of ESP calculated using actual concentrations and CO<sub>2</sub>-normalized concentrations: **(a)** efficiencies for PM<sub>1</sub> and **(b)** efficiencies for PNC.

##### SM-3 Supplementary tables

- Table S1** Description of the measurement equipment
- Table S2** Flue gas characteristics and concentrations of particulate and gaseous pollutants (standardized to NTP and 13% O<sub>2</sub>) for individual test batch ( $n = 45$ )
- Table S3** Fuel-mass-specific emission factors of particulate and gaseous pollutants for individual test batch ( $n = 45$ )

#### References

## SM-1 Calculation of emission factors

Fuel-specific emission factors ( $EF_{fuel}$ ) were calculated using Eqs. S1 and S2.<sup>1</sup>

$$EF_{energy} = C_n \times \lambda \times k \times Q_s \quad (S1)$$

$$EF_{fuel} = EF_{energy} \times H_u \quad (S2)$$

where  $EF_{energy}$  is energy-specific emission factor,  $C_n$  is the normalized concentration of a pollutant. Similarly, specific exhaust volume for stoichiometric combustion ( $Q_s$ ) is constant for a given fuel (approximately 0.25 m<sup>3</sup>/MJ for wood fuel).<sup>1</sup>  $H_u$  is the calorific value of wood fuel. The values of air-to-fuel ratio ( $\lambda$ ) and fuel moisture factor ( $k$ ) were calculated using Eq. S3–S5.<sup>1</sup>

$$\lambda = \frac{20.9}{20.9 - [O_2]} \quad (S3)$$

$$k = \frac{H_u}{H_u - H_w} \quad (S4)$$

$$H_w = \left( \frac{\gamma}{1 - \gamma} \right) l_v \quad (S5)$$

where  $[O_2]$  is the concentration of oxygen in flue gas (13% when pollutant concentration,  $C_n$ , is already standardized to 13% O<sub>2</sub>) and  $H_w$  is heat absorbed during fuel moisture evaporation. Similarly,  $\gamma$  is the mass fraction of water in wet fuel (15% for the fuel used in the present study) and  $l_v$  is the latent heat of vaporization for water (2.5 MJ/kg at 0 °C).

## SM-2 Supplementary figures

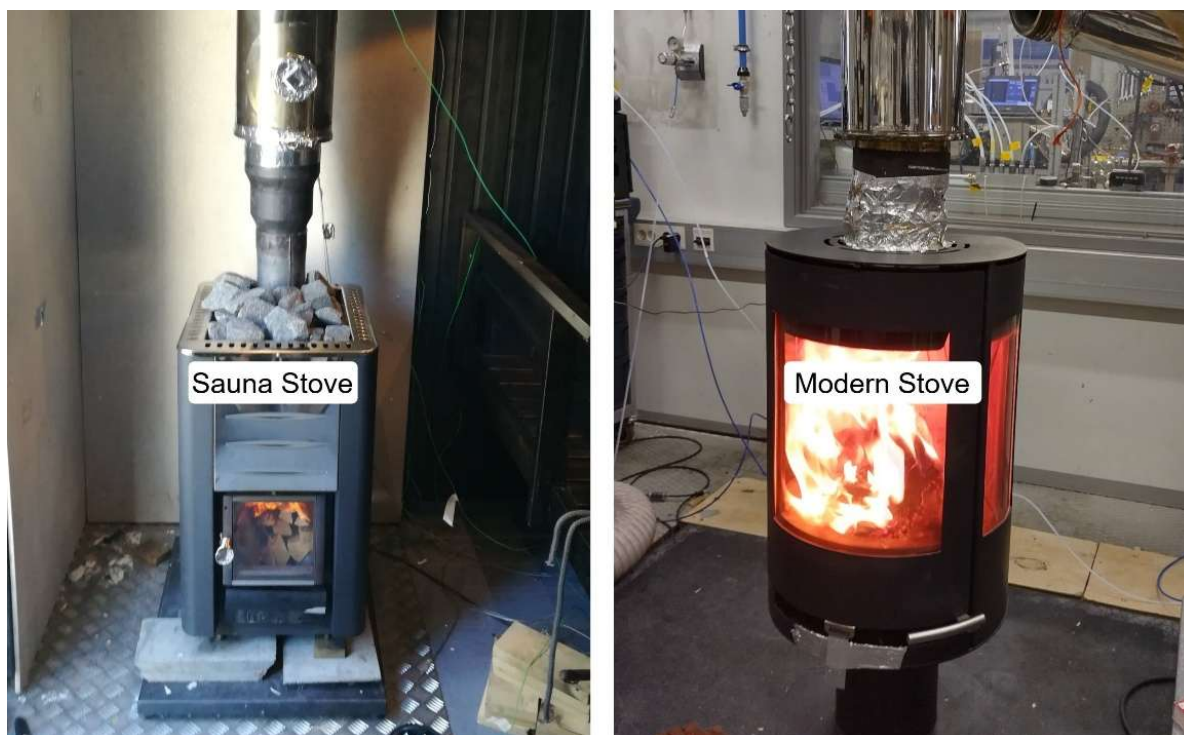

**Fig. S1** Photographs of the traditional wood sauna stove (SS) and modern wood stove (MS) tested in the present study.

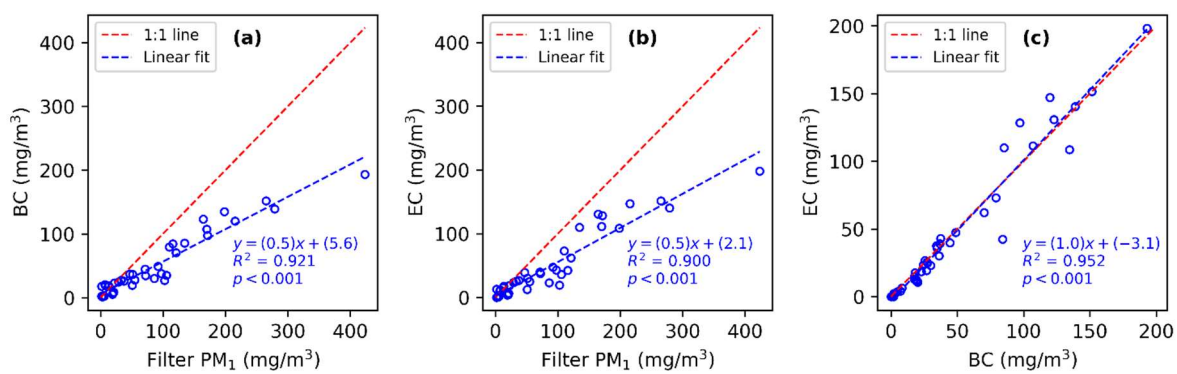

**Fig. S2** Relationships between concentrations of gravimetric PM<sub>1</sub>, BC and EC: **(a)** gravimetric PM<sub>1</sub> vs. BC, **(b)** gravimetric PM<sub>1</sub> vs. EC, and **(c)** BC vs. EC. All concentrations are standardized to NTP and 13% O<sub>2</sub>.

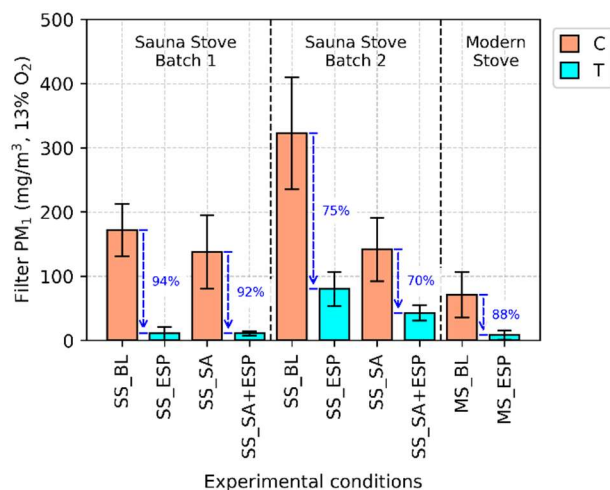

**Fig. S3** Comparisons of gravimetric PM<sub>1</sub> between the control and treatment groups under various experimental conditions. Values in blue indicate reduction efficiencies of ESP. Error bars represent SDs.

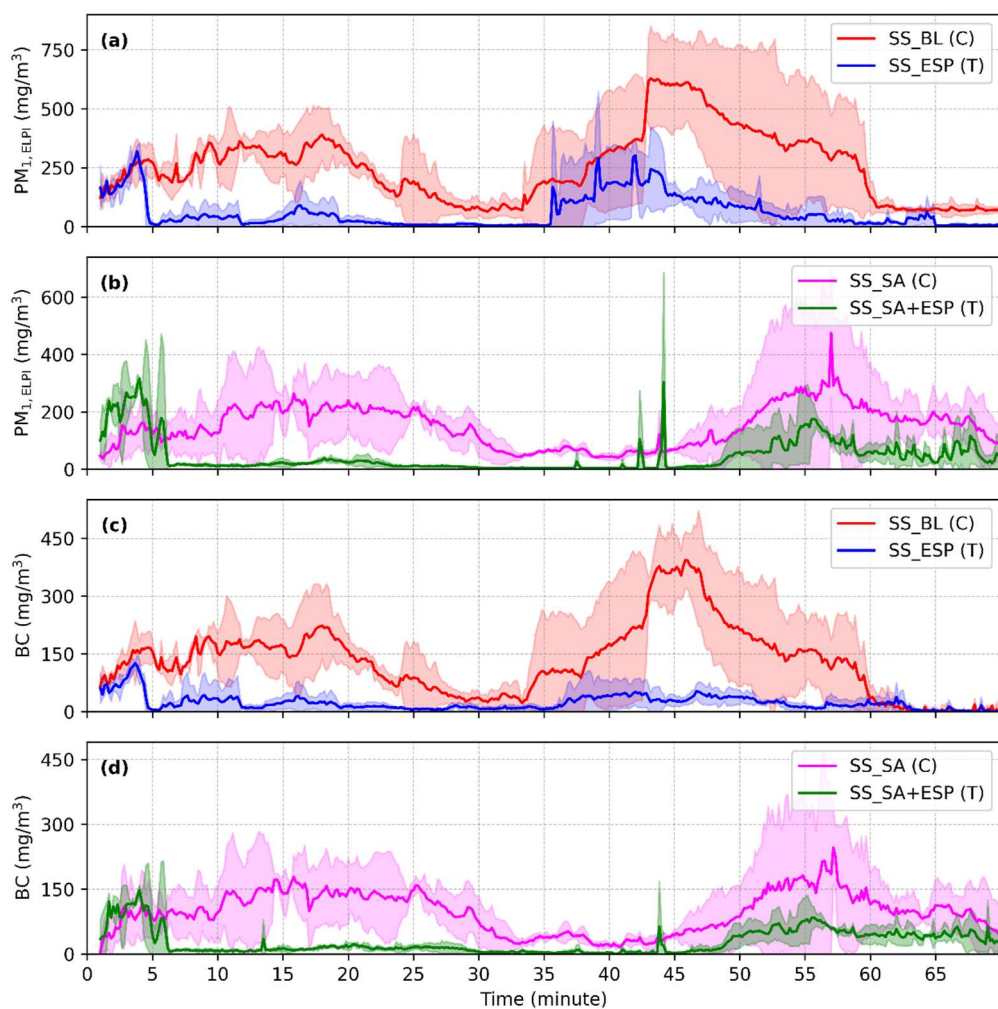

**Fig. S4** Comparisons of real-time PM and BC concentrations between the control (C) and treatment (T) groups during SS tests: **(a)** PM<sub>1,ELPI</sub> for SS\_BL vs. SS\_ESP, **(b)** PM<sub>1,ELPI</sub> for SS\_SA vs. SS\_SA+ESP, **(c)** BC for SS\_BL vs. SS\_ESP, and **(d)** BC for SS\_SA vs. SS\_SA+ESP. Each curve represents the mean of three replicates and includes two sequential batches: batch 1 (0–35 min) and batch 2 (35 min to the end). All concentrations are standardized to NTP and 13% O<sub>2</sub>. Error bands represent SD.

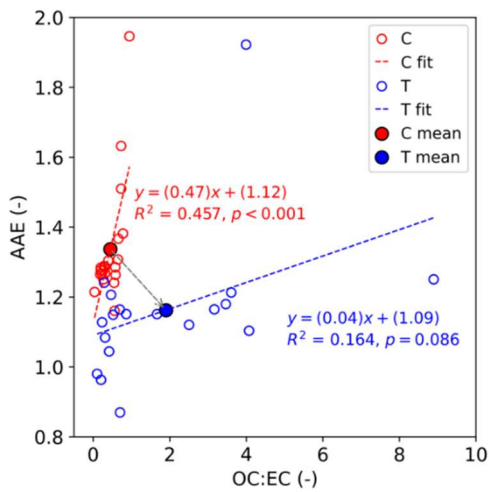

**Fig. S5** Relationship between OC:EC ratio and AAE in the control (C) and treatment (T) groups; gray arrow shows the direction of change in particle properties from the control to treatment group.

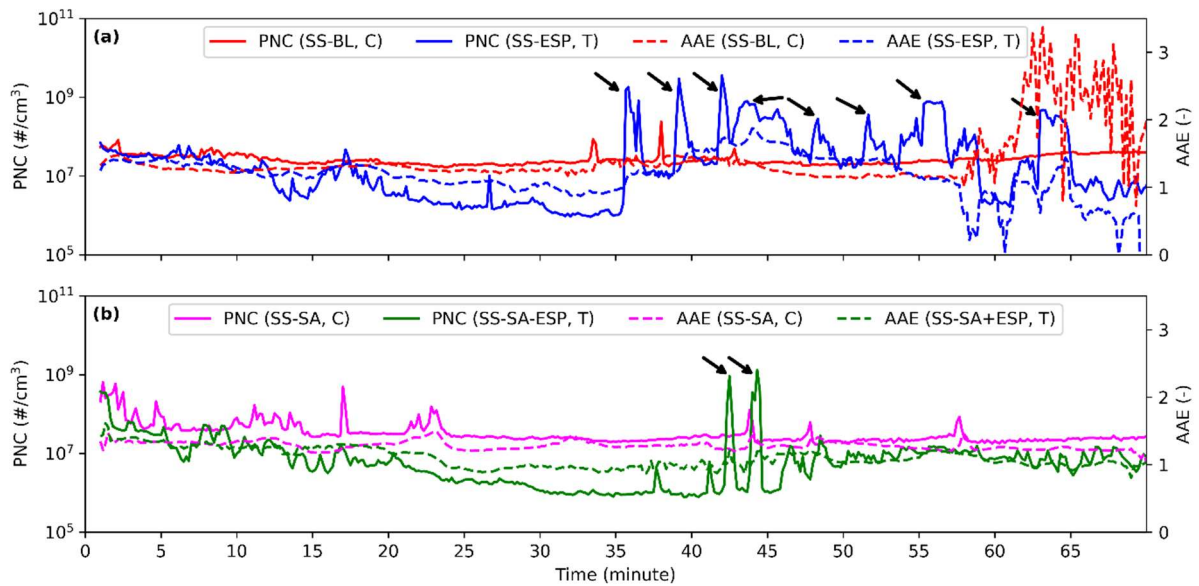

**Fig. S6** Comparison of real-time PNC and AAE between the control (C) and treatment (T) groups during SS tests: (a) SS\_BL vs. SS\_ESP and (b) SS\_SA vs. SS\_SA+ESP. Each curve represents the mean of three replicates and includes two sequential batches: batch 1 (0–35 min) and batch 2 (35 min to the end). Numerous PNC peaks higher than the control levels can be observed in the treatment test curves, which are indicated by arrows. All concentrations are standardized to NTP and 13% O<sub>2</sub>.

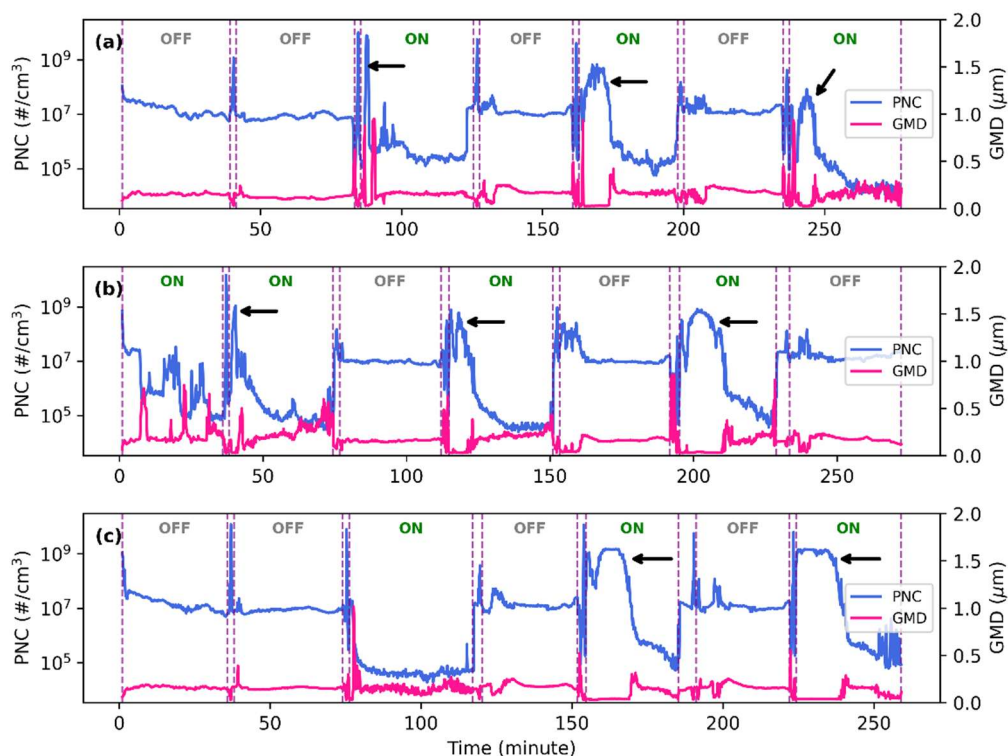

**Fig. S7** Real-time PNC and AAE for the control (C) and treatment (T) batches of MS tests: **(a)** replicate test 1, **(b)** replicate test 2, and **(c)** replicate test 3. All concentrations are standardized to NTP and 13% O<sub>2</sub>. Control and treatment batches are denoted by “OFF” and “ON”, respectively, and are separated by vertical dotted lines. PNC peaks in the treatment batches are indicated by arrows.

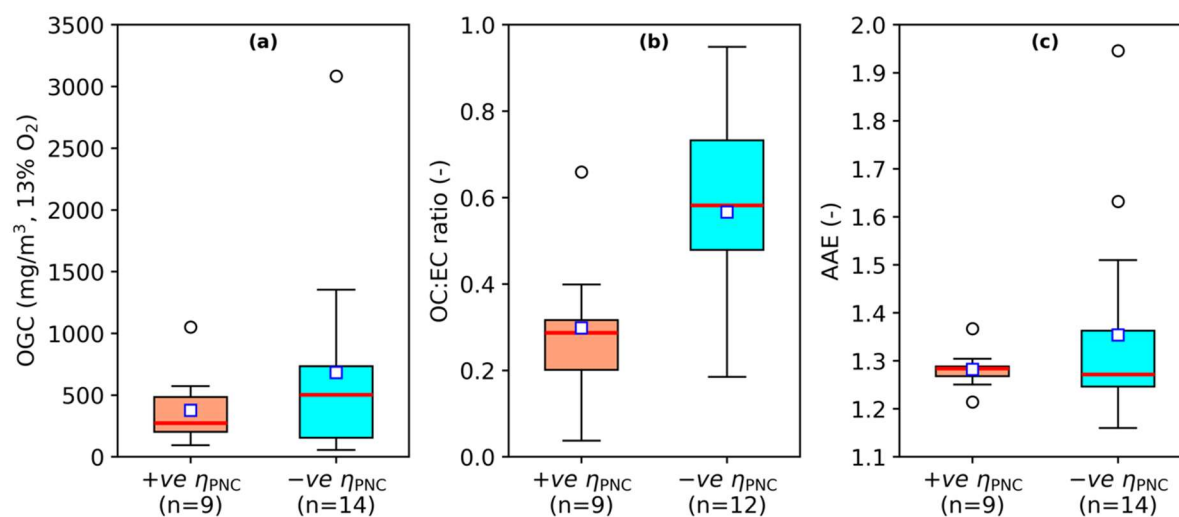

**Fig. S8** Comparison of flue gas properties upstream of the ESP between the cases with positive efficiency on PNC (+ve  $\eta_{\text{PNC}}$ ) and negative efficiency on PNC (-ve  $\eta_{\text{PNC}}$ ): **(a)** organic gaseous carbon (OGC) concentration, **(b)** OC:EC ratio and **(c)** AAE.

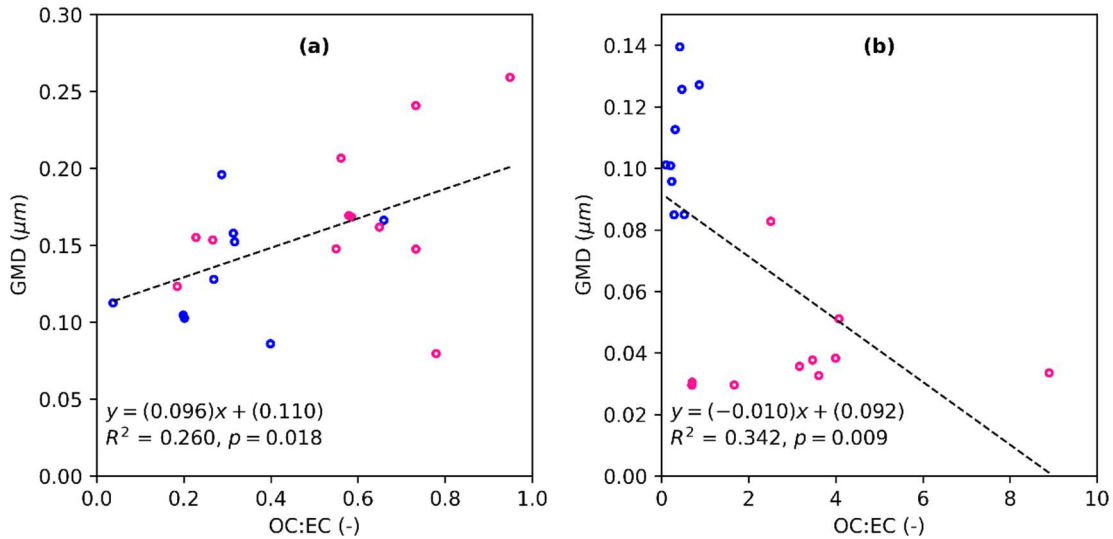

**Fig. S9** Relationship between OC:EC ratio and GMD: **(a)** control batches and **(b)** treatment batches. Scatter points in blue represent the experimental conditions exhibiting positive ESP efficiency on PNC (+ve  $\eta_{\text{PNC}}$ ), whereas scatter points in pink represent those exhibiting negative ESP efficiency on PNC (-ve  $\eta_{\text{PNC}}$ ). One of the batches in the treatment group had a very high OC:EC (>8), which could be due to high measurement uncertainty at low particulate matter emissions.

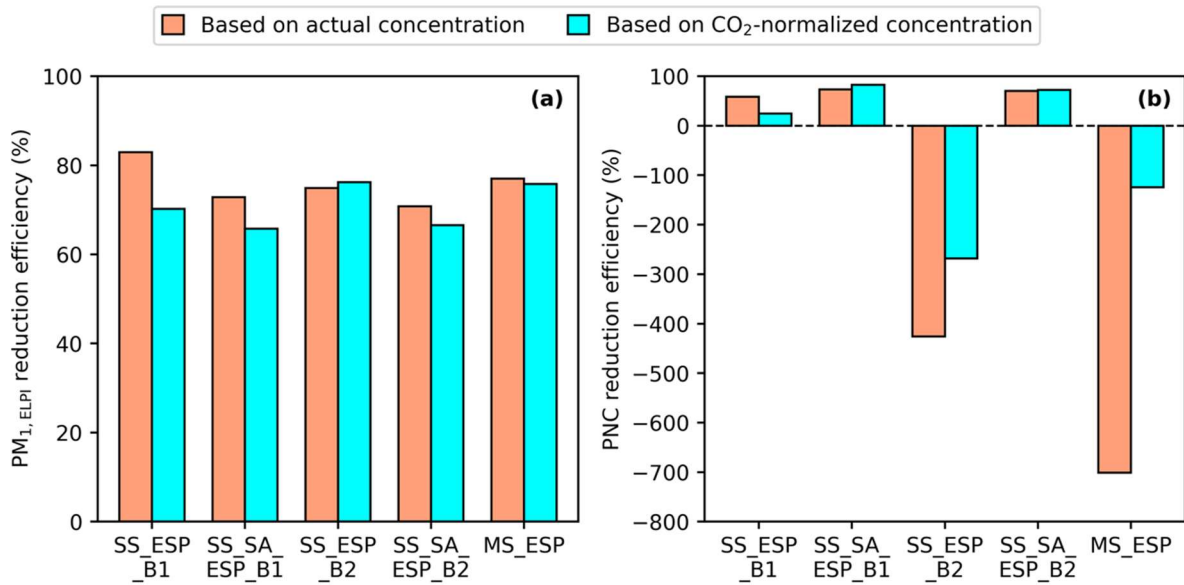

**Fig. S10** Comparison of emission reduction efficiencies of ESP calculated using actual concentrations and CO<sub>2</sub>-normalized concentrations : **(a)** efficiencies for PM<sub>1</sub> and **(b)** efficiencies for PNC.

## SM-3 Supplementary tables

**Table S1** Description of the measurement equipment

| Parameters                                               | Analytical instrument                                                                     | Additional information                                                                                                                                                  |
|----------------------------------------------------------|-------------------------------------------------------------------------------------------|-------------------------------------------------------------------------------------------------------------------------------------------------------------------------|
| THC                                                      | FID (FIDAMAT 6, Siemens AG, Nürnberg, Germany)                                            | Calibration at 0 and 500 ppm propane<br>Measurement range: 0–99999 ppm<br>Signal processing time < 1 s<br>Zero drift < 1%/month of the smallest possible measuring span |
| CO                                                       | Siemens gas analyzers (Ultramat 23, Siemens AG, Nürnberg, Germany)                        | Calibration at 0 and 1000 ppm<br>Measurement range: 0–2.5%                                                                                                              |
| NO                                                       | Siemens gas analyzers (Ultramat 23, Siemens AG, Nürnberg, Germany)                        | Calibration at 0 and 100 ppm<br>Measurement range: 0–500 ppm                                                                                                            |
| CO <sub>2</sub> (flue gas)                               | Siemens gas analyzers (Ultramat 23, Siemens AG, Nürnberg, Germany)                        | Calibration at 0% and 10%<br>Measurement range: 0–25%                                                                                                                   |
| CO <sub>2</sub> (dilution air)                           | Vaisala Carbocap (GMP343, Vaisala, Vantaa, Finland)                                       | Factory calibrated<br>Measurement range: 0–1000 ppm                                                                                                                     |
| VOCs and OGC                                             | Fourier-transform infrared analyzer (DX4000, Gasmeter Technologies Ltd., Vantaa, Finland) | Accuracy within ±2% of the measured range<br>Wave number range: 900–4200 /cm                                                                                            |
| Gravimetric PM <sub>1</sub>                              | Microbalance (Mettler Toledo, MT5, Ohio, USA)                                             | Accuracy within ±1 µg                                                                                                                                                   |
| EC and OC                                                | Thermal-optical carbon analyzer (Sunset Laboratory Inc., Portland, USA)                   | Total carbon measurement range: 0.20–600 µg/cm <sup>2</sup><br>Detection limit: 0.10 µg/cm <sup>2</sup>                                                                 |
| Real-time PM, PNC, and particle number size distribution | Electrical low-pressure impactor (ELPI, Dekati Inc., Kangasala, Finland)                  | Particle cut size: 7 nm to 10 µm<br>Number of stages: 12<br>Response time < 5 s                                                                                         |
| PNC                                                      | Condensation particle counter (CPC 3775, TSI Inc., Minnesota, USA)                        | Lower detection size: 4 nm<br>Accuracy: ±10% at < 5 × 10 <sup>4</sup> particles/cm <sup>3</sup> and ±20% at < 10 <sup>7</sup> particles/cm <sup>3</sup>                 |
| BC                                                       | Aethalometer (AE33-7, Magee Scientific, Berkeley, USA)                                    | LED optical source range: wavelength 370–950 nm<br>Detection limit: < 0.005 µg/m <sup>3</sup>                                                                           |

**Table S2** Flue gas characteristics and concentrations of particulate and gaseous pollutants (standardized to NTP and 13% O<sub>2</sub>) for individual test batch (*n* = 45)

| Test batch <sup>a</sup> | C/T <sup>a</sup> | Fuel load (g) | T (°C) | Draft (Pa) | Filter PM <sub>1</sub> (mg/m <sup>3</sup> ) | PM <sub>1,ELPI</sub> (mg/m <sup>3</sup> ) | BC (mg/m <sup>3</sup> ) | EC (mg/m <sup>3</sup> ) | OC (mg/m <sup>3</sup> ) | AAE (-) | ELPI PNC (#/cm <sup>3</sup> ) | GMD (μm) | CPC PNC (#/cm <sup>3</sup> ) | CO (mg/m <sup>3</sup> ) | NO (mg/m <sup>3</sup> ) | THC (mg/m <sup>3</sup> ) | CO <sub>2</sub> (%) |
|-------------------------|------------------|---------------|--------|------------|---------------------------------------------|-------------------------------------------|-------------------------|-------------------------|-------------------------|---------|-------------------------------|----------|------------------------------|-------------------------|-------------------------|--------------------------|---------------------|
| SS_BL_1_B1              | C                | 3003          | 321    | 6.8        | 215.6                                       | 214.3                                     | 119.9                   | 147.0                   | 46.5                    | 1.29    | 4.55 × 10 <sup>7</sup>        | 0.152    | 3.10 × 10 <sup>7</sup>       | 4688                    | 63.8                    | 369.8                    | 7.2                 |
| SS_BL_1_B2              | C                | 3014          | 430    | 7.9        | 265.2                                       | 280.3                                     | 151.6                   | 151.4                   | 84.9                    | 1.16    | 3.78 × 10 <sup>7</sup>        | 0.207    | 2.59 × 10 <sup>7</sup>       | 6835                    | 71.6                    | 988.3                    | 9.3                 |
| SS_BL_2_B1              | C                | 3002          | 307    | 7.4        | 134.8                                       | 194.0                                     | 85.3                    | 109.8                   | 34.5                    | 1.27    | 3.59 × 10 <sup>7</sup>        | 0.158    | 2.48 × 10 <sup>7</sup>       | 2412                    | 70.7                    | 164.3                    | 6.5                 |
| SS_BL_2_B2              | C                | 3034          | 443    | 8.8        | 423.3                                       | 446.7                                     | 193.1                   | 198.1                   | 187.9                   | 1.95    | 2.88 × 10 <sup>7</sup>        | 0.259    | 2.67 × 10 <sup>7</sup>       | 12418                   | 66.6                    | 2570.6                   | 9.7                 |
| SS_BL_3_B1              | C                | 3002          | 312    | 7.4        | 164.7                                       | 211.7                                     | 122.9                   | 130.7                   | 37.5                    | 1.29    | 3.49 × 10 <sup>7</sup>        | 0.196    | 2.45 × 10 <sup>7</sup>       | 4816                    | 63.9                    | 434.5                    | 7.3                 |
| SS_BL_3_B2              | C                | 3032          | 463    | 8.5        | 279.0                                       | 248.1                                     | 138.9                   | 140.2                   | 102.7                   | 1.63    | 2.73 × 10 <sup>7</sup>        | 0.241    | 2.49 × 10 <sup>7</sup>       | 7691                    | 65.5                    | 1317.9                   | 9.8                 |
| SS_ESP_1_B1             | T                | 3000          | 265    | 7.1        | 2.1                                         | 24.0                                      | 17.7                    | 12.8                    | 3.7                     | 1.24    | 1.66 × 10 <sup>7</sup>        | 0.085    | 1.17 × 10 <sup>7</sup>       | 3130                    | 64.7                    | 216.4                    | 5.5                 |
| SS_ESP_1_B2             | T                | 2995          | 457    | 8.3        | 57.2                                        | 58.8                                      | 19.3                    | 12.4                    | 39.4                    | 1.16    | 1.41 × 10 <sup>8</sup>        | 0.036    | 2.81 × 10 <sup>8</sup>       | 11228                   | 60.6                    | 1561.8                   | 10.2                |
| SS_ESP_2_B1             | T                | 3000          | 301    | 6.6        | 8.2                                         | 34.1                                      | 19.3                    | 11.4                    | 4.8                     | 1.04    | 6.98 × 10 <sup>6</sup>        | 0.140    | 5.86 × 10 <sup>6</sup>       | 2041                    | 68.6                    | 148.0                    | 6.5                 |
| SS_ESP_2_B2             | T                | 3019          | 438    | 7.7        | 86.3                                        | 84.7                                      | 30.0                    | 23.0                    | 57.6                    | 1.12    | 1.42 × 10 <sup>7</sup>        | 0.083    | 1.80 × 10 <sup>7</sup>       | 9056                    | 63.3                    | 1674.3                   | 9.7                 |
| SS_ESP_3_B1             | T                | 3000          | 295    | 7.8        | 22.4                                        | 50.3                                      | 22.9                    | 18.4                    | 8.6                     | 1.21    | 1.06 × 10 <sup>7</sup>        | 0.126    | 1.57 × 10 <sup>7</sup>       | 3563                    | 72.8                    | 313.5                    | 6.3                 |
| SS_ESP_3_B2             | T                | 3013          | 465    | 9.1        | 102.8                                       | 107.8                                     | 26.9                    | 19.2                    | 78.3                    | 1.10    | 4.77 × 10 <sup>7</sup>        | 0.051    | 1.09 × 10 <sup>8</sup>       | 10236                   | 65.5                    | 1860.8                   | 10.1                |
| SS_SA_1_B1              | C                | 3000          | 273    | 6.5        | 170.3                                       | 155.4                                     | 107.2                   | 111.3                   | 22.1                    | 1.28    | 7.09 × 10 <sup>7</sup>        | 0.105    | 4.42 × 10 <sup>7</sup>       | 2399                    | 65.9                    | 230.3                    | 5.7                 |
| SS_SA_1_B2              | C                | 3000          | 486    | 8.0        | 116.0                                       | 129.7                                     | 84.3                    | 42.4                    | 1.6                     | 1.21    | 5.90 × 10 <sup>7</sup>        | 0.113    | 2.53 × 10 <sup>7</sup>       | 3116                    | 65.0                    | 59.0                     | 9.6                 |
| SS_SA_2_B1              | C                | 2999          | 291    | 6.5        | 171.5                                       | 147.1                                     | 97.2                    | 128.3                   | 25.8                    | 1.28    | 6.57 × 10 <sup>7</sup>        | 0.103    | 3.41 × 10 <sup>7</sup>       | 2004                    | 77.2                    | 157.4                    | 5.2                 |
| SS_SA_2_B2              | C                | 3010          | 467    | 7.7        | 198.5                                       | 253.1                                     | 134.7                   | 108.5                   | 71.5                    | 1.37    | 4.18 × 10 <sup>7</sup>        | 0.166    | 2.73 × 10 <sup>7</sup>       | 6292                    | 60.7                    | 1032.9                   | 10.0                |
| SS_SA_3_B1              | C                | 3011          | 252    | 6.9        | 71.6                                        | 69.9                                      | 44.6                    | 39.7                    | 15.8                    | 1.30    | 5.40 × 10 <sup>7</sup>        | 0.086    | 6.73 × 10 <sup>7</sup>       | 1482                    | 75.6                    | 151.0                    | 4.4                 |
| SS_SA_3_B2              | C                | 3003          | 464    | 8.7        | 110.4                                       | 127.3                                     | 79.2                    | 72.9                    | 19.6                    | 1.25    | 5.06 × 10 <sup>7</sup>        | 0.128    | 2.68 × 10 <sup>7</sup>       | 3489                    | 68.8                    | 209.3                    | 9.3                 |
| SS_SA_ESP_1_B1          | T                | 2901          | 265    | 6.2        | 7.2                                         | 39.9                                      | 20.3                    | 10.6                    | 5.6                     | 1.15    | 1.75 × 10 <sup>7</sup>        | 0.085    | 2.19 × 10 <sup>7</sup>       | 2315                    | 72.0                    | 193.5                    | 5.7                 |
| SS_SA_ESP_1_B2          | T                | 3002          | 449    | 7.8        | 51.6                                        | 65.1                                      | 36.4                    | 30.0                    | 26.0                    | 1.15    | 1.07 × 10 <sup>7</sup>        | 0.127    | 1.08 × 10 <sup>7</sup>       | 4959                    | 53.6                    | 628.4                    | 9.8                 |
| SS_SA_ESP_2_B1          | T                | 3000          | 302    | 6.6        | 13.6                                        | 26.6                                      | 18.2                    | 17.6                    | 5.5                     | 1.08    | 1.05 × 10 <sup>7</sup>        | 0.113    | 1.07 × 10 <sup>7</sup>       | 1951                    | 69.9                    | 176.7                    | 5.6                 |
| SS_SA_ESP_2_B2          | T                | 3005          | 433    | 8.2        | 29.2                                        | 32.6                                      | 24.5                    | 23.3                    | 4.8                     | 0.96    | 1.35 × 10 <sup>7</sup>        | 0.101    | 6.19 × 10 <sup>6</sup>       | 1824                    | 76.1                    | 72.6                     | 8.1                 |
| SS_SA_ESP_3_B1          | T                | 3000          | 299    | 6.6        | 12.5                                        | 34.7                                      | 17.9                    | 14.8                    | 3.5                     | 1.13    | 1.37 × 10 <sup>7</sup>        | 0.096    | 6.50 × 10 <sup>6</sup>       | 1645                    | 64.9                    | 142.7                    | 5.6                 |
| SS_SA_ESP_3_B2          | T                | 3035          | 456    | 8.2        | 47.0                                        | 51.3                                      | 37.0                    | 39.1                    | 4.1                     | 0.98    | 1.78 × 10 <sup>7</sup>        | 0.101    | 6.68 × 10 <sup>6</sup>       | 2160                    | 66.6                    | 33.2                     | 8.4                 |
| MS_1_BL_B1              | C                | 1849          | 248    | 11.9       | NA                                          | 101.1                                     | 74.2                    | NA                      | NA                      | 1.20    | 3.26 × 10 <sup>7</sup>        | 0.150    | 1.77 × 10 <sup>7</sup>       | 1484                    | 60.3                    | 128.0                    | 5.1                 |
| MS_1_BL_B2              | C                | 2001          | 368    | 12.0       | 21.4                                        | 14.7                                      | 8.4                     | 6.3                     | 1.2                     | 1.26    | 6.16 × 10 <sup>6</sup>        | 0.123    | 8.16 × 10 <sup>6</sup>       | 741                     | 67.5                    | 28.1                     | 6.3                 |
| MS_1_BL_B4              | C                | 1999          | 433    | 12.0       | 105.9                                       | 56.4                                      | 34.8                    | 35.9                    | 23.3                    | 1.31    | 1.40 × 10 <sup>7</sup>        | 0.162    | 1.31 × 10 <sup>7</sup>       | 4596                    | 52.2                    | 500.1                    | 9.1                 |
| MS_1_BL_B6              | C                | 1999          | 434    | 11.9       | 97.7                                        | 63.1                                      | 37.5                    | 42.9                    | 24.8                    | 1.29    | 1.59 × 10 <sup>7</sup>        | 0.169    | 1.48 × 10 <sup>7</sup>       | 3647                    | 44.9                    | 328.9                    | 9.3                 |
| MS_1_ESP_B3             | T                | 1978          | 409    | 12.0       | 4.8                                         | 15.4                                      | 1.8                     | 0.7                     | 6.0                     | 1.25    | 5.02 × 10 <sup>7</sup>        | 0.034    | 1.47 × 10 <sup>8</sup>       | 1549                    | 56.0                    | 131.1                    | 8.0                 |
| MS_1_ESP_B5             | T                | 2013          | 429    | 12.0       | 5.8                                         | 11.3                                      | 2.1                     | 2.2                     | 3.6                     | 1.15    | 5.16 × 10 <sup>7</sup>        | 0.030    | 6.86 × 10 <sup>7</sup>       | 3308                    | 45.7                    | 277.4                    | 8.8                 |
| MS_1_ESP_B7             | T                | 1998          | 420    | 12.1       | NA                                          | 0.7                                       | 0.3                     | 0.0                     | 0.8                     | 2.12    | 2.74 × 10 <sup>6</sup>        | 0.030    | 4.20 × 10 <sup>6</sup>       | 1875                    | 57.5                    | 101.8                    | 8.4                 |
| MS_2_BL_B3              | C                | 1992          | 417    | 12.4       | 37.6                                        | 42.4                                      | 25.8                    | 26.6                    | 7.1                     | 1.28    | 1.36 × 10 <sup>7</sup>        | 0.154    | 1.00 × 10 <sup>7</sup>       | 770                     | 63.7                    | 43.7                     | 8.4                 |
| MS_2_BL_B5              | C                | 2001          | 419    | 11.9       | 55.1                                        | 50.9                                      | 27.6                    | 24.9                    | 19.4                    | 1.38    | 2.17 × 10 <sup>7</sup>        | 0.080    | 2.74 × 10 <sup>7</sup>       | 3173                    | 51.4                    | 332.7                    | 8.5                 |
| MS_2_BL_B7              | C                | 1999          | 427    | 11.9       | 72.3                                        | 62.6                                      | 34.4                    | 37.5                    | 20.6                    | 1.24    | 1.66 × 10 <sup>7</sup>        | 0.148    | 1.78 × 10 <sup>7</sup>       | 4015                    | 57.3                    | 345.4                    | 8.4                 |
| MS_2_ESP_B1             | T                | 1851          | 258    | 11.8       | NA                                          | 27.7                                      | 20.6                    | NA                      | NA                      | 1.06    | 9.07 × 10 <sup>6</sup>        | 0.153    | 1.00 × 10 <sup>7</sup>       | 1772                    | 65.0                    | 132.6                    | 5.5                 |
| MS_2_ESP_B2             | T                | 1996          | 396    | 12.0       | 5.4                                         | 3.0                                       | 3.6                     | 2.8                     | 1.9                     | 0.87    | 1.09 × 10 <sup>7</sup>        | 0.031    | 2.22 × 10 <sup>7</sup>       | 1274                    | 65.6                    | 91.3                     | 8.1                 |
| MS_2_ESP_B4             | T                | 1997          | 416    | 12.0       | 3.3                                         | 4.4                                       | 1.2                     | 0.7                     | 0.5                     | 1.16    | 1.85 × 10 <sup>7</sup>        | 0.030    | 3.44 × 10 <sup>7</sup>       | 1366                    | 59.7                    | 110.5                    | 8.5                 |
| MS_2_ESP_B6             | T                | 2000          | 434    | 11.9       | 5.8                                         | 16.1                                      | 2.3                     | 1.5                     | 5.3                     | 1.21    | 5.71 × 10 <sup>7</sup>        | 0.033    | 1.43 × 10 <sup>8</sup>       | 3028                    | 48.4                    | 255.2                    | 9.3                 |
| MS_3_BL_B1              | C                | 1852          | 252    | 11.8       | NA                                          | 93.1                                      | 64.3                    | NA                      | NA                      | 1.22    | 3.04 × 10 <sup>7</sup>        | 0.159    | 2.98 × 10 <sup>7</sup>       | 1541                    | 54.0                    | 105.8                    | 5.4                 |
| MS_3_BL_B2              | C                | 2000          | 391    | 12.0       | 33.4                                        | 36.0                                      | 27.2                    | 25.4                    | 5.8                     | 1.27    | 1.24 × 10 <sup>7</sup>        | 0.155    | 8.77 × 10 <sup>6</sup>       | 677                     | 65.1                    | 22.0                     | 7.7                 |
| MS_3_BL_B4              | C                | 2007          | 439    | 13.2       | 121.2                                       | 85.9                                      | 70.3                    | 62.0                    | 36.3                    | 1.26    | 1.90 × 10 <sup>7</sup>        | 0.168    | 1.48 × 10 <sup>7</sup>       | 3785                    | 46.5                    | 480.0                    | 9.1                 |
| MS_3_BL_B6              | C                | 2005          | 438    | 12.0       | 92.3                                        | 64.2                                      | 48.9                    | 47.3                    | 34.7                    | 1.51    | 1.56 × 10 <sup>7</sup>        | 0.148    | 1.51 × 10 <sup>7</sup>       | 3935                    | 49.2                    | 458.3                    | 9.4                 |
| MS_3_ESP_B3             | T                | 1996          | 398    | 12.1       | 2.1                                         | 0.2                                       | 2.1                     | 0.0                     | 1.6                     | 1.00    | 2.33 × 10 <sup>5</sup>        | 0.079    | 5.49 × 10 <sup>5</sup>       | 578                     | 66.9                    | 24.6                     | 7.6                 |
| MS_3_ESP_B5             | T                | 1996          | 442    | 12.0       | 20.6                                        | 32.3                                      | 7.3                     | 4.1                     | 14.2                    | 1.18    | 8.29 × 10 <sup>7</sup>        | 0.038    | 4.07 × 10 <sup>8</sup>       | 3743                    | 47.7                    | 396.0                    | 9.4                 |
| MS_3_ESP_B7             | T                | 2001          | 444    | 12.0       | 19.3                                        | 28.9                                      | 5.2                     | 3.7                     | 14.7                    | 1.92    | 7.59 × 10 <sup>7</sup>        | 0.038    | 4.54 × 10 <sup>8</sup>       | 4987                    | 42.1                    | 431.7                    | 9.2                 |

<sup>a</sup> SS = traditional sauna stove; MS = modern wood stove; BL = baseline; SA = secondary air supply; ESP = electrostatic precipitator; B1 = batch 1 combustion; B2 = batch 2 combustion; C = Control; T = Treatment

**Table S3** Fuel-mass-specific emission factors of particulate and gaseous pollutants for individual test batch ( $n = 45$ )

| Test batch <sup>a</sup> | C/T <sup>a</sup> | Filter PM <sub>1</sub><br>(g/kg-fuel) | PM <sub>1,ELPI</sub><br>(g/kg-fuel) | BC<br>(g/kg-fuel) | EC<br>(g/kg-fuel) | OC<br>(g/kg-fuel) | ELPI PNC<br>(#/kg-fuel) | CPC PNC<br>(#/kg-fuel) | CO<br>(g/kg-fuel) | NO<br>(g/kg-fuel) | THC<br>(g/kg-fuel) |
|-------------------------|------------------|---------------------------------------|-------------------------------------|-------------------|-------------------|-------------------|-------------------------|------------------------|-------------------|-------------------|--------------------|
| SS_BL_1_B1              | C                | 2.70                                  | 2.69                                | 1.50              | 1.84              | 0.58              | $5.7 \times 10^{14}$    | $3.9 \times 10^{14}$   | 58.8              | 0.80              | 4.63               |
| SS_BL_1_B2              | C                | 3.32                                  | 3.51                                | 1.90              | 1.90              | 1.06              | $4.7 \times 10^{14}$    | $3.2 \times 10^{14}$   | 85.7              | 0.90              | 12.4               |
| SS_BL_2_B1              | C                | 1.69                                  | 2.43                                | 1.07              | 1.38              | 0.43              | $4.5 \times 10^{14}$    | $3.1 \times 10^{14}$   | 30.2              | 0.89              | 2.06               |
| SS_BL_2_B2              | C                | 5.31                                  | 5.60                                | 2.42              | 2.48              | 2.36              | $3.6 \times 10^{14}$    | $3.3 \times 10^{14}$   | 156               | 0.83              | 32.2               |
| SS_BL_3_B1              | C                | 2.06                                  | 2.65                                | 1.54              | 1.64              | 0.47              | $4.4 \times 10^{14}$    | $3.1 \times 10^{14}$   | 60.4              | 0.80              | 5.45               |
| SS_BL_3_B2              | C                | 3.50                                  | 3.11                                | 1.74              | 1.76              | 1.29              | $3.4 \times 10^{14}$    | $3.1 \times 10^{14}$   | 96.4              | 0.82              | 16.5               |
| SS_ESP_1_B1             | T                | 0.03                                  | 0.27                                | 0.22              | 0.16              | 0.05              | $2.1 \times 10^{14}$    | $1.5 \times 10^{14}$   | 39.2              | 0.81              | 2.71               |
| SS_ESP_1_B2             | T                | 0.64                                  | 0.66                                | 0.24              | 0.16              | 0.49              | $1.8 \times 10^{15}$    | $3.5 \times 10^{15}$   | 141               | 0.76              | 19.6               |
| SS_ESP_2_B1             | T                | 0.10                                  | 0.43                                | 0.24              | 0.14              | 0.06              | $8.7 \times 10^{13}$    | $7.3 \times 10^{13}$   | 25.6              | 0.86              | 1.85               |
| SS_ESP_2_B2             | T                | 1.08                                  | 1.06                                | 0.38              | 0.29              | 0.72              | $1.8 \times 10^{14}$    | $2.3 \times 10^{14}$   | 114               | 0.79              | 21.0               |
| SS_ESP_3_B1             | T                | 0.28                                  | 0.63                                | 0.29              | 0.23              | 0.11              | $1.3 \times 10^{14}$    | $2.0 \times 10^{14}$   | 44.7              | 0.91              | 3.93               |
| SS_ESP_3_B2             | T                | 1.29                                  | 1.35                                | 0.34              | 0.24              | 0.98              | $6.0 \times 10^{14}$    | $1.4 \times 10^{15}$   | 128               | 0.82              | 23.3               |
| SS_SA_1_B1              | C                | 2.13                                  | 1.95                                | 1.34              | 1.39              | 0.28              | $8.9 \times 10^{14}$    | $5.5 \times 10^{14}$   | 30.1              | 0.83              | 2.89               |
| SS_SA_1_B2              | C                | 1.45                                  | 1.63                                | 1.06              | 0.53              | 0.02              | $7.4 \times 10^{14}$    | $3.2 \times 10^{14}$   | 39.1              | 0.82              | 0.74               |
| SS_SA_2_B1              | C                | 2.15                                  | 1.84                                | 1.22              | 1.61              | 0.32              | $8.2 \times 10^{14}$    | $4.3 \times 10^{14}$   | 25.1              | 0.97              | 1.97               |
| SS_SA_2_B2              | C                | 2.49                                  | 3.17                                | 1.69              | 1.36              | 0.90              | $5.2 \times 10^{14}$    | $3.4 \times 10^{14}$   | 78.9              | 0.76              | 12.9               |
| SS_SA_3_B1              | C                | 0.90                                  | 0.88                                | 0.56              | 0.50              | 0.20              | $6.8 \times 10^{14}$    | $8.4 \times 10^{14}$   | 18.6              | 0.95              | 1.89               |
| SS_SA_3_B2              | C                | 1.38                                  | 1.60                                | 0.99              | 0.91              | 0.25              | $6.3 \times 10^{14}$    | $3.4 \times 10^{14}$   | 43.7              | 0.86              | 2.62               |
| SS_SA_ESP_1_B1          | T                | 0.09                                  | 0.50                                | 0.25              | 0.13              | 0.07              | $2.2 \times 10^{14}$    | $2.7 \times 10^{14}$   | 29.0              | 0.90              | 2.43               |
| SS_SA_ESP_1_B2          | T                | 0.65                                  | 0.82                                | 0.46              | 0.38              | 0.33              | $1.3 \times 10^{14}$    | $1.4 \times 10^{14}$   | 62.2              | 0.67              | 7.88               |
| SS_SA_ESP_2_B1          | T                | 0.17                                  | 0.33                                | 0.23              | 0.22              | 0.07              | $1.3 \times 10^{14}$    | $1.3 \times 10^{14}$   | 24.5              | 0.88              | 2.22               |
| SS_SA_ESP_2_B2          | T                | 0.37                                  | 0.41                                | 0.31              | 0.29              | 0.06              | $1.7 \times 10^{14}$    | $7.8 \times 10^{13}$   | 22.9              | 0.95              | 0.91               |
| SS_SA_ESP_3_B1          | T                | 0.16                                  | 0.44                                | 0.22              | 0.19              | 0.04              | $1.7 \times 10^{14}$    | $8.1 \times 10^{13}$   | 20.6              | 0.81              | 1.79               |
| SS_SA_ESP_3_B2          | T                | 0.59                                  | 0.64                                | 0.46              | 0.49              | 0.05              | $2.2 \times 10^{14}$    | $8.4 \times 10^{13}$   | 27.1              | 0.83              | 0.42               |
| MS_1_BL_B1              | C                | NA                                    | 1.27                                | 0.93              | NA                | NA                | $4.1 \times 10^{14}$    | $2.2 \times 10^{14}$   | 18.6              | 0.76              | 1.60               |
| MS_1_BL_B2              | C                | 0.27                                  | 0.18                                | 0.11              | 0.08              | 0.01              | $7.7 \times 10^{13}$    | $1.0 \times 10^{14}$   | 9.28              | 0.85              | 0.35               |
| MS_1_BL_B4              | C                | 1.33                                  | 0.71                                | 0.44              | 0.45              | 0.29              | $1.8 \times 10^{14}$    | $1.6 \times 10^{14}$   | 57.6              | 0.65              | 6.27               |
| MS_1_BL_B6              | C                | 1.22                                  | 0.79                                | 0.47              | 0.54              | 0.31              | $2.0 \times 10^{14}$    | $1.9 \times 10^{14}$   | 45.7              | 0.56              | 4.12               |
| MS_1_ESP_B3             | T                | 0.06                                  | 0.19                                | 0.02              | 0.01              | 0.08              | $6.3 \times 10^{14}$    | $1.8 \times 10^{14}$   | 19.4              | 0.70              | 1.64               |
| MS_1_ESP_B5             | T                | 0.07                                  | 0.14                                | 0.03              | 0.03              | 0.05              | $6.5 \times 10^{14}$    | $8.6 \times 10^{14}$   | 41.5              | 0.57              | 3.48               |
| MS_1_ESP_B7             | T                | NA                                    | 0.01                                | 0.00              | 0.00              | 0.01              | $3.4 \times 10^{13}$    | $5.3 \times 10^{14}$   | 23.5              | 0.72              | 1.28               |
| MS_2_BL_B3              | C                | 0.47                                  | 0.53                                | 0.32              | 0.33              | 0.09              | $1.7 \times 10^{14}$    | $1.3 \times 10^{14}$   | 9.65              | 0.80              | 0.55               |
| MS_2_BL_B5              | C                | 0.69                                  | 0.64                                | 0.35              | 0.31              | 0.24              | $2.7 \times 10^{14}$    | $3.4 \times 10^{14}$   | 39.8              | 0.64              | 4.17               |
| MS_2_BL_B7              | C                | 0.91                                  | 0.78                                | 0.43              | 0.47              | 0.26              | $2.1 \times 10^{14}$    | $2.2 \times 10^{14}$   | 50.3              | 0.72              | 4.33               |
| MS_2_ESP_B1             | T                | NA                                    | 0.35                                | 0.26              | NA                | NA                | $1.1 \times 10^{14}$    | $1.3 \times 10^{14}$   | 22.2              | 0.82              | 1.66               |
| MS_2_ESP_B2             | T                | 0.07                                  | 0.04                                | 0.04              | 0.03              | 0.02              | $1.4 \times 10^{14}$    | $2.8 \times 10^{14}$   | 16.0              | 0.82              | 1.14               |
| MS_2_ESP_B4             | T                | 0.04                                  | 0.06                                | 0.02              | 0.01              | 0.01              | $2.3 \times 10^{14}$    | $4.3 \times 10^{14}$   | 17.1              | 0.75              | 1.39               |
| MS_2_ESP_B6             | T                | 0.07                                  | 0.20                                | 0.03              | 0.02              | 0.07              | $7.2 \times 10^{14}$    | $1.8 \times 10^{15}$   | 38.0              | 0.61              | 3.20               |
| MS_3_BL_B1              | C                | NA                                    | 1.17                                | 0.81              | NA                | NA                | $3.8 \times 10^{14}$    | $3.7 \times 10^{14}$   | 19.3              | 0.68              | 1.33               |
| MS_3_BL_B2              | C                | 0.42                                  | 0.45                                | 0.34              | 0.32              | 0.07              | $1.6 \times 10^{14}$    | $1.1 \times 10^{14}$   | 8.49              | 0.82              | 0.28               |
| MS_3_BL_B4              | C                | 1.52                                  | 1.08                                | 0.88              | 0.78              | 0.45              | $2.4 \times 10^{14}$    | $1.9 \times 10^{14}$   | 47.4              | 0.58              | 6.02               |
| MS_3_BL_B6              | C                | 1.16                                  | 0.81                                | 0.61              | 0.59              | 0.43              | $2.0 \times 10^{14}$    | $1.9 \times 10^{14}$   | 49.3              | 0.62              | 5.74               |
| MS_3_ESP_B3             | T                | 0.03                                  | 0.00                                | 0.03              | 0.00              | 0.02              | $2.9 \times 10^{12}$    | $6.9 \times 10^{12}$   | 7.24              | 0.84              | 0.31               |
| MS_3_ESP_B5             | T                | 0.26                                  | 0.40                                | 0.09              | 0.05              | 0.18              | $1.0 \times 10^{15}$    | $5.1 \times 10^{15}$   | 46.9              | 0.60              | 4.96               |
| MS_3_ESP_B7             | T                | 0.24                                  | 0.36                                | 0.06              | 0.05              | 0.18              | $9.5 \times 10^{14}$    | $5.7 \times 10^{15}$   | 62.5              | 0.53              | 5.41               |

<sup>a</sup> SS = traditional sauna stove; MS = modern wood stove; BL = baseline; SA = secondary air supply; ESP = electrostatic precipitator; B1 = batch 1 combustion; B2 = batch 2 combustion; C = Control; T = Treatment

## References

- 1 J. Tissari, Fine Particle Emissions from Residential Wood Combustion (Ph.D. Dissertation), University of Kuopio, 2008.
